# Supplementary material for: Mucoadhesive Buccal Film of Estradiol for Hormonal Replacement Therapy: Development and In-Vivo Performance Prediction
Source: MDPI journal article supplement (doi:10.3390/pharmaceutics14030542), 2022-02-28
Supplement: s1 [file s1]

Article

# Mucoadhesive Buccal Film of Estradiol for Hormonal Replacement Therapy: Development and In-Vivo Performance Prediction

SADIKALMAHDI ABDELLA<sup>1,2</sup>, Franklin Afinjuomo<sup>1</sup>, Yunmei Song<sup>1</sup>, Richard Upton<sup>3</sup>, and Sanjay Garg<sup>1,\*</sup>

<sup>1</sup> Pharmaceutical Innovation and Development (PIDG) Group, Clinical and Health Sciences, University of South Australia, Adelaide, SA 5000, Australia; sadikalmahdi.abdella@mymail.unisa.edu.au (S.A.); franklin.afinjuomo@unisa.edu.au (F.A.); may.song@unisa.edu.au (Y.S.)

<sup>2</sup> School of Pharmacy, College of Health Sciences, Addis Ababa University, Zambia St, Addis Ababa 1000, Ethiopia

<sup>3</sup> Clinical and Health Sciences, University of South Australia, Adelaide, SA 5000, Australia; richard.upton@unisa.edu.au

\* Correspondence: sanjay.garg@unisa.edu.au

**Table S1.** Folding endurance of films prepared by co-solvency and nano-emulsion.

| Formulation | Co-solvency | Nano-emulsion |
|-------------|-------------|---------------|
| F1          | 350         | 320           |
| F2          | 325         | 333           |
| F3          | 343         | 340           |
| Mean        | 331         | 339           |

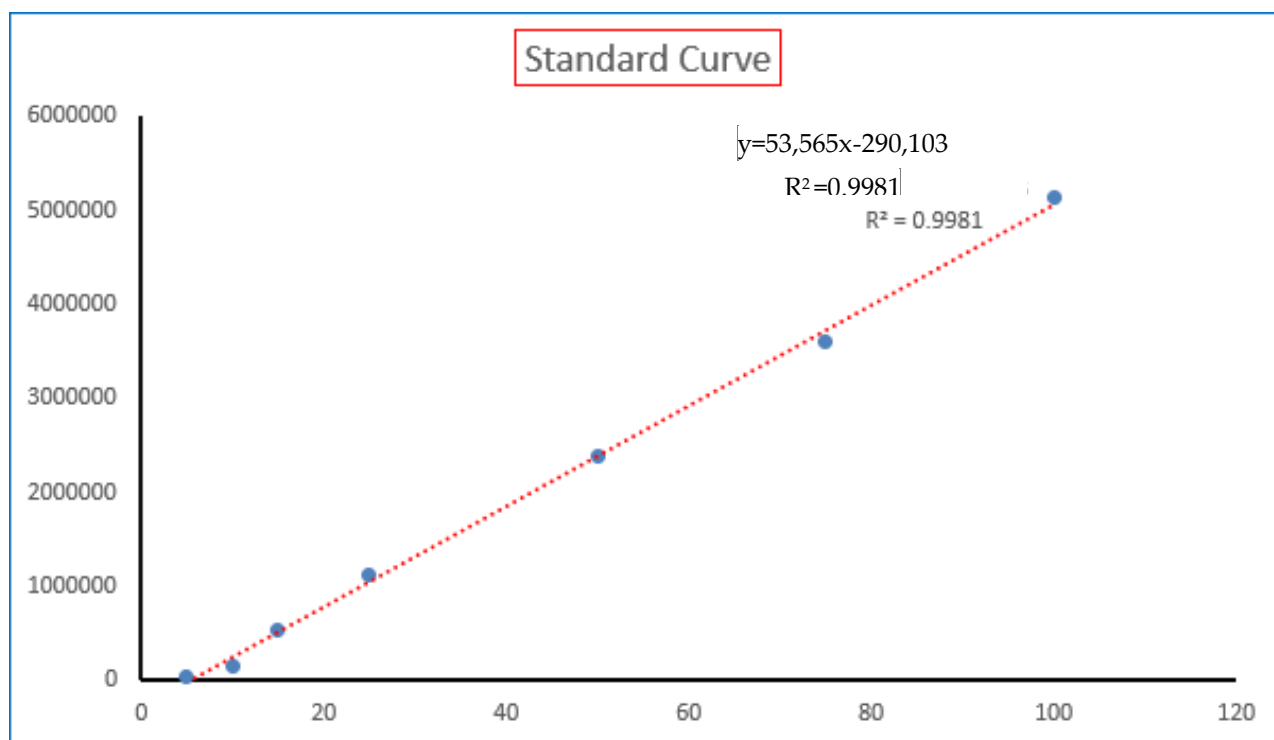

**Figure S1.** Calibration curve of estradiol and regression equation.
